# Supplementary material for: Propargyl ether-functionalized poly(m-phenylene): a new precursor for the preparation of polymers with high modulus and high Tg
Source: Royal Society of Chemistry journal article supplement (doi:10.1039/c5ra01515d), 2015-01-01
Supplement: c5ra01515d1.pdf [file c5ra01515d1.pdf]

Electronic Supplementary Information for

**Propargyl Ether-Functionalized Poly(*m*-phenylene): A New Precursor  
for the Preparation of the Polymers with High Modulus and High  $T_g$**

Yijie Luo<sup>a</sup>, Jing Sun<sup>a,\*</sup>, Kaikai Jin<sup>a</sup>, Jiajia Wang<sup>a</sup>, Guangsu Huang<sup>b</sup> and Qiang Fang<sup>a,\*</sup>

<sup>a</sup> Key Laboratory of Synthetic and Self-Assembly Chemistry for Organic Functional Molecules, Shanghai Institute of Organic Chemistry, Chinese Academy of Sciences, 345 Lingling Road, Shanghai 200032, P. R. China

<sup>b</sup> State Key Laboratory of Polymer Materials Engineering, Sichuan University, Chengdu 610065, P. R. China

Email: [qiangfang@mail.sioc.ac.cn](mailto:qiangfang@mail.sioc.ac.cn), [sunjing@sioc.ac.cn](mailto:sunjing@sioc.ac.cn)

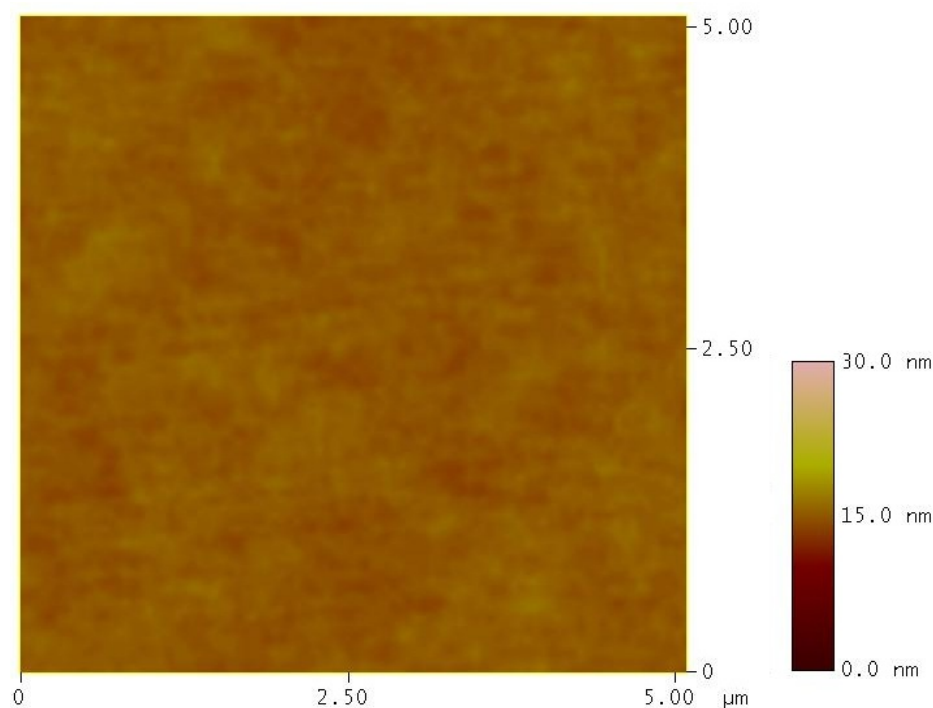

**Fig. S1.** AFM image of the cured **PE-PMP** film on a silicon wafer.

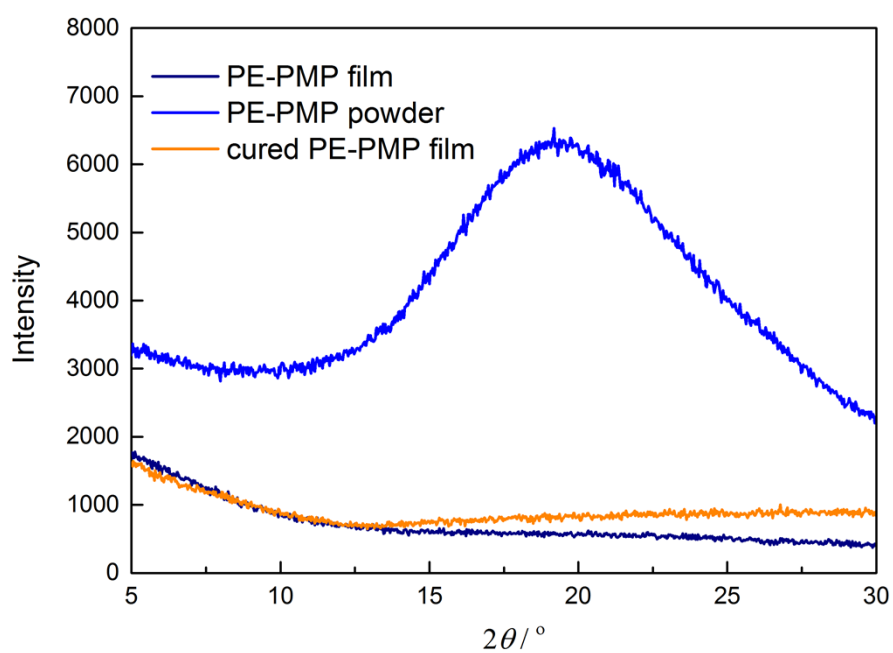

**Fig. S2.** X-ray diffraction (XRD) patterns of **PE-PMP** before and after postpolymerization.
